# Supplementary material for: Double parallel dynamic resolution through lipase-catalyzed asymmetric transformation
Source: Royal Society of Chemistry journal article supplement (doi:10.1039/c3cc38203f), 2013-01-01

## SUPPORTING INFORMATION

# Double Parallel Dynamic Resolution through Lipase-Catalyzed Asymmetric Transformation

*Yan Zhang, Lei Hu, and Olof Ramström\**

KTH Royal Institute of Technology, Department of Chemistry, Teknikringen 30, S-10044 Stockholm, Sweden

### Table of contents

|                                                                              |    |
|------------------------------------------------------------------------------|----|
| General methods                                                              | S2 |
| Generation of dynamic systems and lipase-catalyzed asymmetric transformation | S2 |
| Synthesis of racemic compound <b>4B</b>                                      | S2 |
| NMR-spectra of product <b>4B</b>                                             | S3 |
| HPLC analyses                                                                | S4 |

## General methods

Reagents were obtained from commercial suppliers and used as received. Lipase PS “Amano” IM (EC 3.1.1.3) was purchased from Amano Enzyme Inc.  $^1\text{H}$  and  $^{13}\text{C}$  NMR data were recorded on a Bruker Avance 400 (100) MHz and/or a Bruker Avance 500 (125) MHz, respectively. Chemical shifts are reported as  $\delta$  values (ppm) with  $\text{CDCl}_3$  ( $^1\text{H}$  NMR  $\delta$ 7.26,  $^{13}\text{C}$  NMR  $\delta$ 77.0) as an internal standard.  $J$  values are given in Hertz (Hz). Analytical high performance liquid chromatography (HPLC) with chiral stationary phase was performed on an HP-Agilent 1110 Series controller and a UV detector, using a Daicel Chiralpak OJ column ( $4.6 \times 250$  mm,  $10\ \mu\text{m}$ ). Solvents for HPLC use were of spectrometric grade. Thin layer chromatography (TLC) was performed on precoated Polygram® SIL G/UV 254 silica plates (0.20 mm, Macherey-Nagel), visualized with UV-detection. Flash column chromatography was performed on silica gel 60, 0.040-0.063 mm (SDS).

## Generation of dynamic systems and lipase-catalyzed asymmetric transformation

The dynamic systems were generated by adding 1 equiv of each aldehyde (**1**, **2** and **3**, 0.1 mmol), together with 1 equiv of 2-nitropropane **A** (0.1 mmol), 1-butanethiol **B** (0.1 mmol) and TEA (0.5 mmol) in the specific dry solvent (0.6 mL). After addition of phenyl acetate (3 equiv, 0.3 mmol), the solution was transferred to a 1.5 mL sealed-cap vial containing PS-IM and ground 4 Å molecular sieves (20 mg), dried for 2 days before use, under argon atmosphere at RT or 0 °C.  $^1\text{H}$  NMR was used to follow the reaction process until completion. For complex systems, work-up and column purification were necessary before chiral analysis. The reaction mixture was filtered to remove PS-IM, and the solvent removed by evaporation. The crude product was dissolved in  $\text{CH}_2\text{Cl}_2$ , and the solution was extracted with water and brine. Drying over  $\text{MgSO}_4$ , filtration and evaporation provided a yellow oil, which was purified by flash column chromatography using hexanes/EtOAc (25:1, v/v) as eluent. For similar systems but with only one aldehyde as starting material, the crude reaction mixtures were directly sampled and analyzed by  $^1\text{H}$  NMR and HPLC.

## Synthesis of racemic compound 4B

3-nitrobenzaldehyde **1** (30.2 mg, 0.2 mmol) was dissolved in  $\text{CH}_2\text{Cl}_2$  (0.6 mL), after which 1-butanethiol (21.6  $\mu\text{L}$ , 0.24 mmol), TEA (83.4  $\mu\text{L}$ , 0.6 mmol) and acetic anhydride (56.7  $\mu\text{L}$ , 0.6 mmol) were added to the solution. The reaction mixture was stirred at RT for 2 d. After neutralization with 1M HCl solution, the reaction solution was extracted with  $\text{CH}_2\text{Cl}_2$  (2 mL  $\times$  3), dried over  $\text{MgSO}_4$ , filtered, and the solvent evaporated under vacuum. The crude product was further purified using column chromatography (hexane/EtOAc, 10:1 (v/v)) providing compound **4B** (10.6 mg) as a light yellow oil.  $^1\text{H}$  NMR (500 MHz,  $\text{CDCl}_3$ , 25 °C)  $\delta$  0.90 (t,  $J=7.4$ , H,  $\text{CH}_3$ ), 1.39 (m, 2H,  $\text{CH}_2$ ), 1.59 (m, 2H,  $\text{CH}_2$ ), 2.20 (s, 3H,  $\text{CH}_3$ ), 2.54 (m, 1H,  $\text{CH}_2$ ), 2.71 (m, 1H,  $\text{CH}_2$ ), 7.03 (s, 1H, CH), 7.55 (t,  $J=7.9$ , 1H, CH), 7.77 (d,  $J=7.9$ , 1H, CH), 8.18 (d,  $J=7.9$ , 1H, CH), 8.30 (s, 1H, CH);  $^{13}\text{C}$  NMR (125 MHz,  $\text{CDCl}_3$ , 25 °C)  $\delta$  13.7, 21.3, 22.0, 31.0, 31.7, 78.2, 121.5, 123.5, 129.7, 132.5, 140.4, 148.5, 169.9.

$^1\text{H}$  NMR-,  $^{13}\text{C}$  NMR-spectra of product **4B**

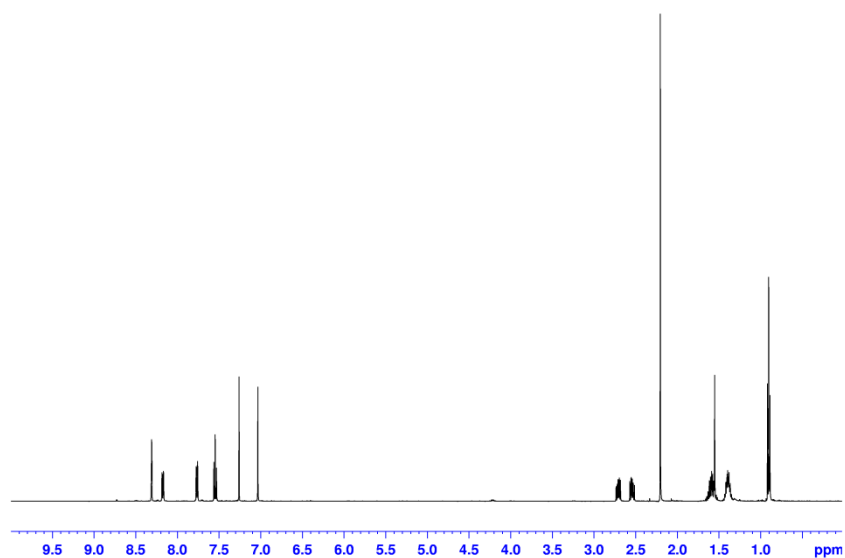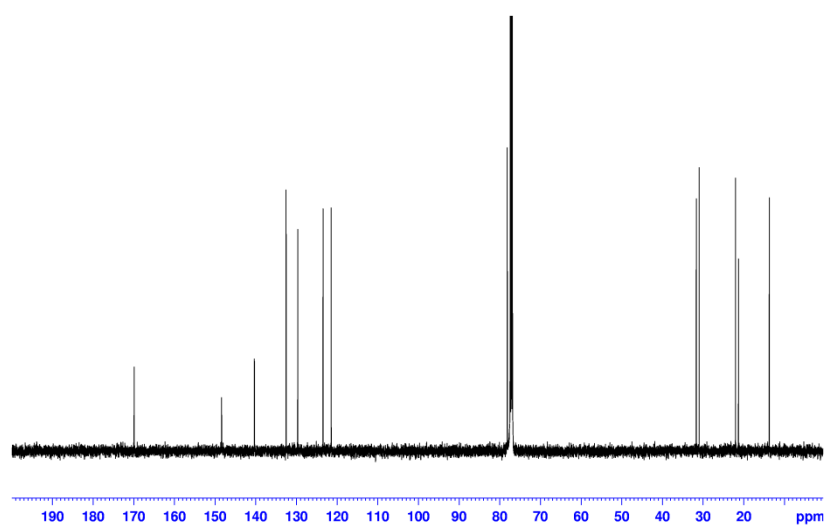

## HPLC analyses

The enantiomeric purity of product **4B** from the dynamic systems was determined by analytical HPLC using a Daicel Chiralpak OJ column. Analyses were carried out at 298 K and 210 nm for 40 min, using hexane:*i*PrOH (90:10, v/v) as mobile phase.

a) Racemic mixture of **4B**.

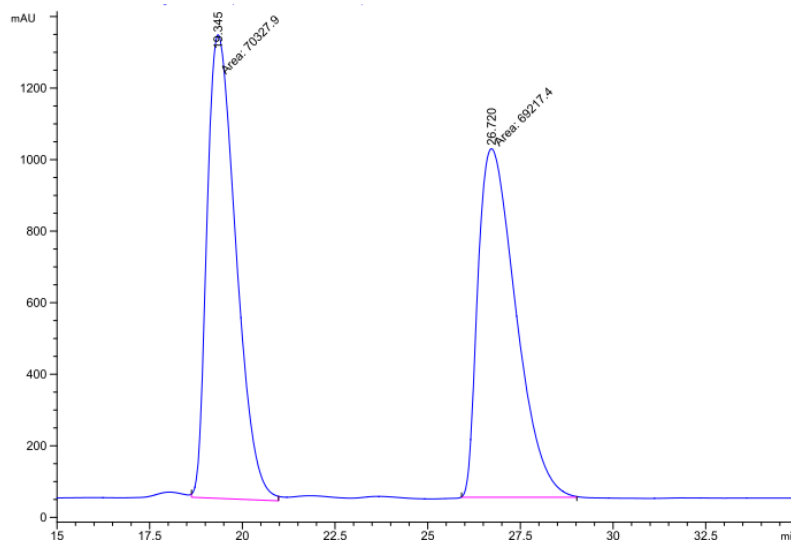

b) Product **4B** separated from dynamic system.

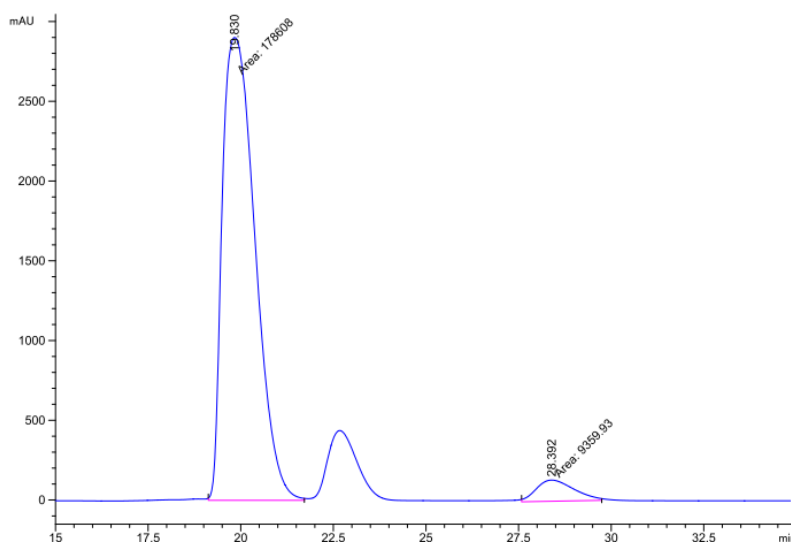

Supplement: c3cc38203f.pdf [file c3cc38203f.pdf]
